# Supplementary material for: Epidemiology of dengue and the effect of seasonal climate variation on its dynamics: a spatio-temporal descriptive analysis in the Chao-Shan area on China’s southeastern coast
Source: PubMed Central journal article supplement — BMJ Open. 2019 May 24;9(5):e024197. doi: 10.1136/bmjopen-2018-024197 (PMC6538008; doi:10.1136/bmjopen-2018-024197), 2019-05-24
Supplement: bmjopen-2018-024197supp001.pdf [file bmjopen-2018-024197supp001.pdf]

## Supplementary File

**Table S1. STROBE 2007 (v4) checklist of items to be included in reports of observational studies in epidemiology\***

**Checklist for cohort, case-control, and cross-sectional studies (combined)**

| Section/Topic             | Item # | Recommendation                                                                                                                                                                                                                                                                                                                                                                                                                                 | Reported on page # |
|---------------------------|--------|------------------------------------------------------------------------------------------------------------------------------------------------------------------------------------------------------------------------------------------------------------------------------------------------------------------------------------------------------------------------------------------------------------------------------------------------|--------------------|
| Title and abstract        | 1      | (a) Indicate the study’s design with a commonly used term in the title or the abstract                                                                                                                                                                                                                                                                                                                                                         | 1, 2               |
|                           |        | (b) Provide in the abstract an informative and balanced summary of what was done and what was found                                                                                                                                                                                                                                                                                                                                            | 2                  |
| Introduction              |        |                                                                                                                                                                                                                                                                                                                                                                                                                                                |                    |
| Background/rationale      | 2      | Explain the scientific background and rationale for the investigation being reported                                                                                                                                                                                                                                                                                                                                                           | 4, 5               |
| Objectives                | 3      | State specific objectives, including any pre-specified hypotheses                                                                                                                                                                                                                                                                                                                                                                              | 5                  |
| Methods                   |        |                                                                                                                                                                                                                                                                                                                                                                                                                                                |                    |
| Study design              | 4      | Present key elements of study design early in the paper                                                                                                                                                                                                                                                                                                                                                                                        | 6, 7               |
| Setting                   | 5      | Describe the setting, locations, and relevant dates, including periods of recruitment, exposure, follow-up, and data collection                                                                                                                                                                                                                                                                                                                | 6, 7               |
| Participants              | 6      | (a) Cohort study—Give the eligibility criteria, and the sources and methods of selection of participants. Describe methods of follow-up<br>Case-control study—Give the eligibility criteria, and the sources and methods of case ascertainment and control selection. Give the rationale for the choice of cases and controls<br>Cross-sectional study—Give the eligibility criteria, and the sources and methods of selection of participants | 6, 7               |
|                           |        | (b) Cohort study—For matched studies, give matching criteria and number of exposed and unexposed<br>Case-control study—For matched studies, give matching criteria and the number of controls per case                                                                                                                                                                                                                                         | 6, 7               |
| Variables                 | 7      | Clearly define all outcomes, exposures, predictors, potential confounders, and effect modifiers. Give diagnostic criteria, if applicable                                                                                                                                                                                                                                                                                                       | 6, 7               |
| Data sources/ measurement | 8*     | For each variable of interest, give sources of data and details of methods of assessment (measurement). Describe comparability of assessment methods if there is more than one group                                                                                                                                                                                                                                                           | 6, 7               |

|                        |     |                                                                                                                                                                                                                                                                                                           |       |
|------------------------|-----|-----------------------------------------------------------------------------------------------------------------------------------------------------------------------------------------------------------------------------------------------------------------------------------------------------------|-------|
| Bias                   | 9   | Describe any efforts to address potential sources of bias                                                                                                                                                                                                                                                 | 7, 8  |
| Study size             | 10  | Explain how the study size was arrived at                                                                                                                                                                                                                                                                 | 6     |
| Quantitative variables | 11  | Explain how quantitative variables were handled in the analyses. If applicable, describe which groupings were chosen and why                                                                                                                                                                              | 6, 7  |
| Statistical methods    | 12  | (a) Describe all statistical methods, including those used to control for confounding                                                                                                                                                                                                                     | 7, 8  |
|                        |     | (b) Describe any methods used to examine subgroups and interactions                                                                                                                                                                                                                                       | 7, 8  |
|                        |     | (c) Explain how missing data were addressed                                                                                                                                                                                                                                                               | 7, 8  |
|                        |     | (d) <i>Cohort study</i> —If applicable, explain how loss to follow-up was addressed<br><i>Case-control study</i> —If applicable, explain how matching of cases and controls was addressed<br><i>Cross-sectional study</i> —If applicable, describe analytical methods taking account of sampling strategy | 7, 8  |
|                        |     | (e) Describe any sensitivity analyses                                                                                                                                                                                                                                                                     |       |
|                        |     |                                                                                                                                                                                                                                                                                                           |       |
| Results                |     |                                                                                                                                                                                                                                                                                                           |       |
| Participants           | 13* | (a) Report numbers of individuals at each stage of study—eg numbers potentially eligible, examined for eligibility, confirmed eligible, included in the study, completing follow-up, and analysed                                                                                                         | 9     |
|                        |     | (b) Give reasons for non-participation at each stage                                                                                                                                                                                                                                                      |       |
|                        |     | (c) Consider use of a flow diagram                                                                                                                                                                                                                                                                        |       |
| Descriptive data       | 14* | (a) Give characteristics of study participants (eg demographic, clinical, social) and information on exposures and potential confounders                                                                                                                                                                  | 9     |
|                        |     | (b) Indicate number of participants with missing data for each variable of interest                                                                                                                                                                                                                       |       |
|                        |     | (c) <i>Cohort study</i> —Summarise follow-up time (eg, average and total amount)                                                                                                                                                                                                                          |       |
| Outcome data           | 15* | <i>Cohort study</i> —Report numbers of outcome events or summary measures over time                                                                                                                                                                                                                       |       |
|                        |     | <i>Case-control study</i> —Report numbers in each exposure category, or summary measures of exposure                                                                                                                                                                                                      |       |
|                        |     | <i>Cross-sectional study</i> —Report numbers of outcome events or summary measures                                                                                                                                                                                                                        | 9     |
| Main results           | 16  | (a) Give unadjusted estimates and, if applicable, confounder-adjusted estimates and their precision (eg, 95% confidence interval). Make clear which confounders were adjusted for and why they were included                                                                                              | 9, 10 |

|                          |    |                                                                                                                                                                            |            |
|--------------------------|----|----------------------------------------------------------------------------------------------------------------------------------------------------------------------------|------------|
|                          |    | (b) Report category boundaries when continuous variables were categorized                                                                                                  | 9, 10      |
|                          |    | (c) If relevant, consider translating estimates of relative risk into absolute risk for a meaningful time period                                                           |            |
| Other analyses           | 17 | Report other analyses done—eg analyses of subgroups and interactions, and sensitivity analyses                                                                             | 9, 10      |
| <b>Discussion</b>        |    |                                                                                                                                                                            |            |
| Key results              | 18 | Summarise key results with reference to study objectives                                                                                                                   | 11, 12, 13 |
| Limitations              | 19 | Discuss limitations of the study, taking into account sources of potential bias or imprecision. Discuss both direction and magnitude of any potential bias                 | 13         |
| Interpretation           | 20 | Give a cautious overall interpretation of results considering objectives, limitations, multiplicity of analyses, results from similar studies, and other relevant evidence | 13         |
| Generalisability         | 21 | Discuss the generalisability (external validity) of the study results                                                                                                      | 13, 14     |
| <b>Other information</b> |    |                                                                                                                                                                            |            |
| Funding                  | 22 | Give the source of funding and the role of the funders for the present study and, if applicable, for the original study on which the present article is based              | 14         |

\*Give information separately for cases and controls in case-control studies and, if applicable, for exposed and unexposed groups in cohort and cross-sectional studies.

**Note:** An Explanation and Elaboration article discusses each checklist item and gives methodological background and published examples of transparent reporting. The STROBE checklist is best used in conjunction with this article (freely available on the Web sites of PLoS Medicine at <http://www.plosmedicine.org/>, Annals of Internal Medicine at <http://www.annals.org/>, and Epidemiology at <http://www.epidem.com/>). Information on the STROBE Initiative is available at [www.strobe-statement.org](http://www.strobe-statement.org).

**Table S2. Model fit assessment of a set of generalized additive model for location, scale and shape (GAMLSS) models where climatic variables including mean temperature (MeanTemp), rainfall (Rainfall) and relative humidity (RH) were modeled as smooth terms with different degrees of freedom (*df*). The criterion, Schwartz Bayesian Criterion (SBC), was used for model selection, where models with lower value of SBC are preferred. 0, 1, 2 and 3 were considered for the values of the parameter *df* in the GAMLSS models, respectively. Cubic spline (CS) function was used as the smooth function term.**

| Rank of model | Model formula                                   | SBC     |
|---------------|-------------------------------------------------|---------|
| 1             | ~ CS(MeanTemp, 1)                               | 686.105 |
| 2             | ~ CS(MeanTemp, 2)                               | 686.871 |
| 3             | ~ CS(MeanTemp, 3)                               | 689.207 |
| 4             | ~ MeanTemp                                      | 690.681 |
| 5             | ~ CS(MeanTemp, 1) + CS(Rainfall, 1)             | 691.759 |
| 6             | ~ CS(MeanTemp, 2) + CS(Rainfall, 1)             | 691.811 |
| 7             | ~ CS(MeanTemp, 3) + CS(Rainfall, 1)             | 692.740 |
| 8             | ~ CS(MeanTemp, 1) + CS(Rainfall, 2)             | 693.124 |
| 9             | ~ CS(MeanTemp, 2) + CS(Rainfall, 2)             | 693.623 |
| 10            | ~ MeanTemp + Rainfall                           | 694.608 |
| 11            | ~ MeanTemp + RH                                 | 694.628 |
| 12            | ~ CS(MeanTemp, 1) + CS(RH, 1)                   | 694.790 |
| 13            | ~ CS(MeanTemp, 2) + CS(RH, 1)                   | 695.267 |
| 14            | ~ CS(MeanTemp, 3) + CS(Rainfall, 2)             | 695.459 |
| 15            | ~ CS(MeanTemp, 3) + CS(RH, 1)                   | 695.533 |
| 16            | ~ CS(MeanTemp, 1) + CS(Rainfall, 3)             | 696.474 |
| 17            | ~ CS(MeanTemp, 2) + CS(Rainfall, 3)             | 697.546 |
| 18            | ~ CS(MeanTemp, 2) + CS(RH, 1) + CS(Rainfall, 1) | 699.055 |
| 19            | ~ CS(MeanTemp, 3) + CS(RH, 1) + CS(Rainfall, 1) | 699.193 |
| 20            | ~ CS(MeanTemp, 1) + CS(RH, 2)                   | 699.303 |
| 21            | ~ CS(MeanTemp, 3) + CS(Rainfall, 3)             | 699.363 |
| 22            | ~ CS(MeanTemp, 2) + CS(RH, 1) + CS(Rainfall, 2) | 699.565 |
| 23            | ~ CS(MeanTemp, 1) + CS(RH, 1) + CS(Rainfall, 1) | 699.655 |
| 24            | ~ MeanTemp + RH + Rainfall                      | 699.672 |
| 25            | ~ CS(MeanTemp, 2) + CS(RH, 2)                   | 699.851 |
| 26            | ~ CS(MeanTemp, 3) + CS(RH, 2)                   | 700.121 |
| 27            | ~ CS(MeanTemp, 3) + CS(RH, 1) + CS(Rainfall, 2) | 700.460 |
| 28            | ~ CS(MeanTemp, 1) + CS(RH, 1) + CS(Rainfall, 2) | 700.535 |
| 29            | ~ CS(MeanTemp, 2) + CS(RH, 1) + CS(Rainfall, 3) | 703.064 |
| 30            | ~ CS(MeanTemp, 2) + CS(RH, 2) + CS(Rainfall, 1) | 703.307 |

|    |                                                 |         |
|----|-------------------------------------------------|---------|
| 31 | ~ CS(MeanTemp, 3) + CS(RH, 2) + CS(Rainfall, 1) | 703.395 |
| 32 | ~ CS(MeanTemp, 1) + CS(RH, 1) + CS(Rainfall, 3) | 703.790 |
| 33 | ~ CS(MeanTemp, 2) + CS(RH, 2) + CS(Rainfall, 2) | 703.836 |
| 34 | ~ CS(MeanTemp, 1) + CS(RH, 3)                   | 703.955 |
| 35 | ~ CS(MeanTemp, 1) + CS(RH, 2) + CS(Rainfall, 1) | 704.037 |
| 36 | ~ CS(MeanTemp, 3) + CS(RH, 1) + CS(Rainfall, 3) | 704.168 |
| 37 | ~ CS(MeanTemp, 2) + CS(RH, 3)                   | 704.432 |
| 38 | ~ CS(MeanTemp, 3) + CS(RH, 2) + CS(Rainfall, 2) | 704.519 |
| 39 | ~ CS(MeanTemp, 3) + CS(RH, 3)                   | 704.845 |
| 40 | ~ CS(MeanTemp, 1) + CS(RH, 2) + CS(Rainfall, 2) | 705.177 |
| 41 | ~ RH                                            | 707.331 |
| 42 | ~ CS(MeanTemp, 2) + CS(RH, 2) + CS(Rainfall, 3) | 707.364 |
| 43 | ~ CS(Rainfall, 1)                               | 707.472 |
| 44 | ~ CS(Rainfall, 2)                               | 707.558 |
| 45 | ~ Rainfall                                      | 707.656 |
| 46 | ~ CS(MeanTemp, 3) + CS(RH, 3) + CS(Rainfall, 1) | 707.991 |
| 47 | ~ CS(MeanTemp, 2) + CS(RH, 3) + CS(Rainfall, 1) | 708.093 |
| 48 | ~ CS(MeanTemp, 3) + CS(RH, 2) + CS(Rainfall, 3) | 708.267 |
| 49 | ~ CS(MeanTemp, 1) + CS(RH, 2) + CS(Rainfall, 3) | 708.330 |
| 50 | ~ CS(MeanTemp, 2) + CS(RH, 3) + CS(Rainfall, 2) | 708.505 |
| 51 | ~ CS(MeanTemp, 1) + CS(RH, 3) + CS(Rainfall, 1) | 708.792 |
| 52 | ~ CS(MeanTemp, 3) + CS(RH, 3) + CS(Rainfall, 2) | 709.107 |
| 53 | ~ CS(MeanTemp, 1) + CS(RH, 3) + CS(Rainfall, 2) | 709.867 |
| 54 | ~ CS(Rainfall, 3)                               | 710.239 |
| 55 | ~ CS(RH, 1)                                     | 711.324 |
| 56 | ~ CS(MeanTemp, 2) + CS(RH, 3) + CS(Rainfall, 3) | 712.016 |
| 57 | ~ RH + Rainfall                                 | 712.666 |
| 58 | ~ CS(MeanTemp, 3) + CS(RH, 3) + CS(Rainfall, 3) | 712.849 |
| 59 | ~ CS(MeanTemp, 1) + CS(RH, 3) + CS(Rainfall, 3) | 713.085 |
| 60 | ~ CS(RH, 2)                                     | 715.945 |
| 61 | ~ CS(RH, 1) + CS(Rainfall, 1)                   | 717.272 |
| 62 | ~ CS(RH, 1) + CS(Rainfall, 2)                   | 717.727 |
| 63 | ~ CS(RH, 3)                                     | 720.343 |
| 64 | ~ CS(RH, 1) + CS(Rainfall, 3)                   | 721.098 |
| 65 | ~ CS(RH, 2) + CS(Rainfall, 1)                   | 721.843 |
| 66 | ~ CS(RH, 2) + CS(Rainfall, 2)                   | 722.342 |
| 67 | ~ CS(RH, 3) + CS(Rainfall, 1)                   | 725.910 |
| 68 | ~ CS(RH, 2) + CS(Rainfall, 3)                   | 725.926 |
| 69 | ~ CS(RH, 3) + CS(Rainfall, 2)                   | 726.601 |
| 70 | ~ CS(RH, 3) + CS(Rainfall, 3)                   | 730.204 |

---

**R codes. Code examples show how to employ the time-dependent wavelet analysis to assess the periodicity of the time series, and GAMLSS model to study the association between seasonal characteristics of dengue and climatic variables in this study.**

##### Part I: Code example for generating Figure 5 in this study #####

# Wavelet analysis

# Install R package

install.packages("dplR")

# Load the package

library(dplR)

# Read the dataset 'mydata.csv' into R

my.data <- read.csv("mydata .csv", head=TRUE)

my.morlet <- morlet(y1=x, x1=my.data \$week, p2=7, dj=0.1, siglvl=0.95)

# y1 denotes the series to be transformed

# x1 is a vector of values giving the years for the plot

# p2 represents the number of power of two to be computed for the wavelet transform

# siglvl is the level for the significance test

my.morlet\$period # The period

my.morlet\$coi # The cone of influence

my.morlet\$Signif # The significant values

my.morlet\$Power # The squared power

# The wavelet.plot function creates a filled.contour plot of a continuous wavelet transform as output from the morlet function.

wavelet.plot(my.morlet, useRaster=T, add.spline=T, reverse.y=T, add.coi=T, add.sig=T)

##### Part II: Code example for generating Figure 6 in this study #####

# Generalized additive model for location, scale and shape model (GAMLSS) analysis

# Install R package

```
install.packages("gamlss")

# Load the package

library(gamlss)

# Read the dataset 'mydata.csv' into R

my.data <- read.csv("mydata .csv", head=TRUE)

head(my.data)

# Establish a GAMLSS model using the gamlss.fit function

gamlss.fit <- gamlss(case_num ~ cs(avg_tem_mean, 3) + cs(avg_rh, 1) + cs(avg_rainfall, 2) ,
data= my.data, family=NBI, n.cyc=2000, trace=FALSE)

# The setting "family=NBI" denotes the negative binomial distribution used for the
corresponding link function for over-dispersed count data

gamlss.fit

# Calculate the Generalised Akaike information criterion for a fitted GAMLSS object

GAIC(gamlss.fit)

# Plot residual diagnostics for a fitted GAMLSS Object

plot(gamlss.fit$residuals)

# Plot regression terms for a specified parameter of a fitted GAMLSS object

term.plot(gamlss.fit, se=TRUE, partial=TRUE)
```
